# Supplementary material
Source: publisher site journal article supplement (https://www.spandidos-publications.com/3131/downloadSupplementary)
Supplement: Supplementary file 1 [file downloadSupplementary]

## Sheet: Sheet2
Table SXII. Kyoto Encyclopedia of Genes and Genomes analysis of the DEmRNAs involved in the differentially expressed long non-coding RNA-DEmRNA co-expression network.
Category	Term	Count	%	P-Value	Genes	List Total	Pop Hits	Pop Total	Fold Enrichment	Bonferroni	Benjamini	False discovery rate
KEGG_PATHWAY	rno05330:Allograft rejection	7	0.0308887	1.02×10-4	RT1-CE16, CD40LG, RT1-DB1, RT1-CE10, RT1-DMA, RT1-BA, RT1-A3	85	70	7749	9.11647	0.0158997	0.0158997	0.122793
KEGG_PATHWAY	rno05320:Autoimmune thyroid disease	7	0.0308887	1.74×10-4	RT1-CE16, CD40LG, RT1-DB1, RT1-CE10, RT1-DMA, RT1-BA, RT1-A3	85	77	7749	8.2877	0.0269163	0.0135499	0.208953
KEGG_PATHWAY	rno05416:Viral myocarditis	7	0.0308887	4.08×10-4	RT1-CE16, CD40LG, RT1-DB1, RT1-CE10, RT1-DMA, RT1-BA, RT1-A3	85	90	7749	7.09059	0.0620576	0.0211292	0.48994
KEGG_PATHWAY	rno04514:Cell adhesion molecules (CAMs)	9	0.0397141	5.19×10-4	RT1-CE16, CD40LG, RT1-DB1, RT1-CE10, CLDN22, RT1-DMA, RT1-BA, RT1-A3, CLDN24	85	172	7749	4.77025	0.0783295	0.0201854	0.623356
KEGG_PATHWAY	rno05332:Graft-versus-host disease	6	0.026476	7.06×10-4	RT1-CE16, RT1-DB1, RT1-CE10, RT1-DMA, RT1-BA, RT1-A3	85	66	7749	8.2877	0.105018	0.0219459	0.846963
KEGG_PATHWAY	rno04940:Type I diabetes mellitus	6	0.026476	0.00134205	RT1-CE16, RT1-DB1, RT1-CE10, RT1-DMA, RT1-BA, RT1-A3	85	76	7749	7.19721	0.190099	0.0345302	1.60336
KEGG_PATHWAY	rno04612:Antigen processing and presentation	6	0.026476	0.00392207	RT1-CE16, RT1-DB1, RT1-CE10, RT1-DMA, RT1-BA, RT1-A3	85	97	7749	5.63905	0.460426	0.0843667	4.6197
KEGG_PATHWAY	rno05310:Asthma	4	0.0176507	0.00443762	CD40LG, RT1-DB1, RT1-DMA, RT1-BA	85	31	7749	11.7632	0.502548	0.0835814	5.21218
KEGG_PATHWAY	rno00052:Galactose metabolism	4	0.0176507	0.00485875	AKR1B8, AKR1B7, GALE, LCT	85	32	7749	11.3956	0.534518	0.0814553	5.69365
KEGG_PATHWAY	rno05168:Herpes simplex infection	8	0.0353014	0.00873842	RT1-CE16, IFIT1, RT1-DB1, RT1-CE10, RT1-DMA, ARNTL, RT1-BA, RT1-A3	85	216	7749	3.37647	0.747908	0.128724	10.0248
KEGG_PATHWAY	rno05166:HTLV-I infection	9	0.0397141	0.0127181	RT1-CE16, IL1R2, CDKN1A, CD3G, RT1-DB1, RT1-CE10, RT1-DMA, RT1-BA, RT1-A3	85	289	7749	2.83904	0.86595	0.16697	14.2774
KEGG_PATHWAY	rno04672:Intestinal immune network for IgA production	4	0.0176507	0.0141414	CD40LG, RT1-DB1, RT1-DMA, RT1-BA	85	47	7749	7.7587	0.89312	0.170006	15.7531
KEGG_PATHWAY	rno04145:Phagosome	7	0.0308887	0.0180132	RT1-CE16, RT1-DB1, RT1-CE10, MPO, RT1-DMA, RT1-BA, RT1-A3	85	193	7749	3.30649	0.942378	0.197102	19.6502
KEGG_PATHWAY	rno00220:Arginine biosynthesis	3	0.013238	0.01944	GLUD1, ASL, GPT2	85	20	7749	13.6747	0.954139	0.197603	21.0441
KEGG_PATHWAY	rno05150:Staphylococcus aureus infection	4	0.0176507	0.0204961	RT1-DB1, RT1-DMA, RT1-BA, CFD	85	54	7749	6.75294	0.961277	0.194872	22.0615
KEGG_PATHWAY	rno04977:Vitamin digestion and absorption	3	0.013238	0.0233075	APOA4, LRAT, PLB1	85	22	7749	12.4316	0.97534	0.206587	24.7117
KEGG_PATHWAY	rno05145:Toxoplasmosis	5	0.0220634	0.0358632	CD40LG, RT1-DB1, RT1-DMA, ALOX5, RT1-BA	85	115	7749	3.96368	0.996766	0.2863	35.5689
KEGG_PATHWAY	rno05140:Leishmaniasis	4	0.0176507	0.0429361	PTGS2, RT1-DB1, RT1-DMA, RT1-BA	85	72	7749	5.06471	0.998982	0.318034	41.0331
KEGG_PATHWAY	rno00040:Pentose and glucuronate interconversions	3	0.013238	0.0493601	AKR1B8, AKR1B7, UGDH	85	33	7749	8.2877	0.999646	0.341822	45.6243
DEmRNA, differentially expressed mRNA.
